# Supplementary material
Source: publisher figshare collection journal article supplement (https://tandf.figshare.com/ndownloader/files/16526276)
Supplement: Supplementary file 1 [file 16526276]

## Appendix A

**Table A1.** Interviewees

|    |                                            |                        |
|----|--------------------------------------------|------------------------|
| 1  | IACW 1                                     | 14-May-18              |
| 2  | Welsh Government                           | 07-Nov-16              |
| 3  | Former Welsh Government                    | 29-Nov-17              |
| 4  | Senior industrialist                       | 20-Apr-18              |
| 5  | Welsh Government                           | 14-Jan-14              |
| 6  | Swansea University                         | 08-Nov-16              |
| 7  | Welsh Government                           | 14-Oct-16              |
| 8  | Welsh Government                           | 25-Jan-18              |
| 9  | Former Welsh Government                    | 18-Jul-17              |
| 10 | FSB Wales                                  | 06-Jul-18              |
| 11 | Consultant 1                               | 20-Nov-16<br>23-Jul-18 |
| 12 | Consultant 2                               | 04-Oct-16              |
| 13 | UK Government                              | 13-Aug-18              |
| 14 | Former Welsh Government                    | 14-Nov-17              |
| 15 | Welsh Government                           | 05-Nov-16              |
| 16 | Higher Education Funding Council for Wales | 14-Jun-18              |
| 17 | NHS                                        | 16-Jul-18              |
| 18 | Large company                              | 19-Jul-18              |
| 19 | IACW 2                                     | 31-Jul-18              |
| 20 | Swansea University                         | 16 May 18              |
| 21 | Welsh Government                           | 12-Jul-18              |
